# Supplementary material for: Comparison of Thermoresponsive Hydrogels Synthesized by Conventional Free Radical and RAFT Polymerization
Source: MDPI journal article supplement (doi:10.3390/ma12172697), 2019-08-23
Supplement: s1 [file s1]

## Supporting Information

# Comparison of Thermoresponsive Hydrogels Synthesized by Conventional Free Radical and RAFT polymerization

Fanny Joubert \* Peyton Cheong Phey Denn, Yujie Guo, and George Pasparakis \*

UCL School of Pharmacy, 29-39 Brunswick Square, London WC1N 1AX, UK

\* Correspondence: f.joubert@ucl.ac.uk (F.J.); g.pasparakis@ucl.ac.uk (G.P.)

Received: 4 March 2019; Accepted: 20 August 2019; Published: date

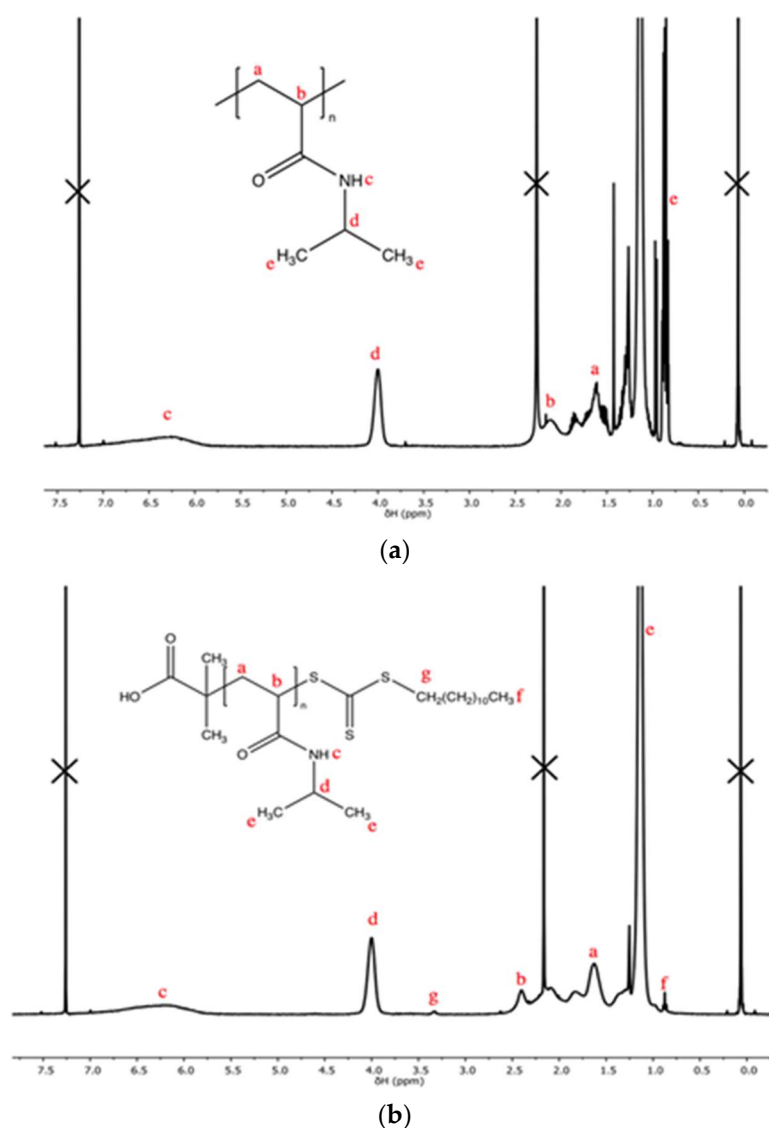

**Figure S1.** <sup>1</sup>H NMR (400 MHz, CDCl<sub>3</sub>) of PNIPAAm synthesised using (a) FRP and (b) RAFT polymerization.

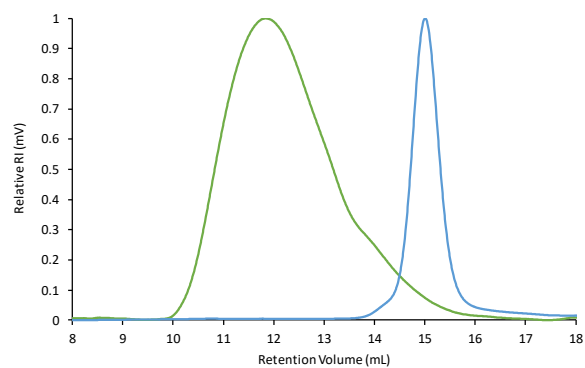

**Figure S2.** GPC trace of PNIPAAm synthesised using FRP (green) and RAFT polymerization (blue).

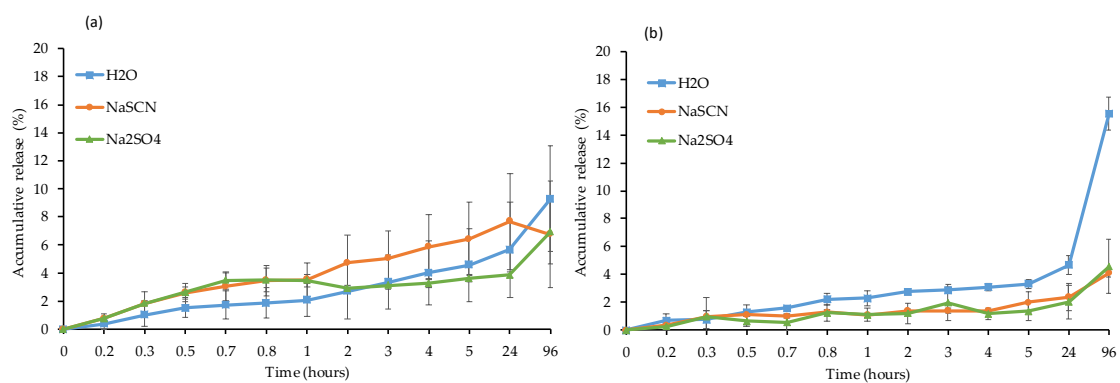

**Figure S3.** Release of fluorescein from G2F (a) and G2R (b) in different media.
